# Supplementary material
Source: PubMed Central journal article supplement (PMC8105039)
Supplement: awab007_supplementary_data.pdf [file awab007_supplementary_data.pdf]

## Supplementary material

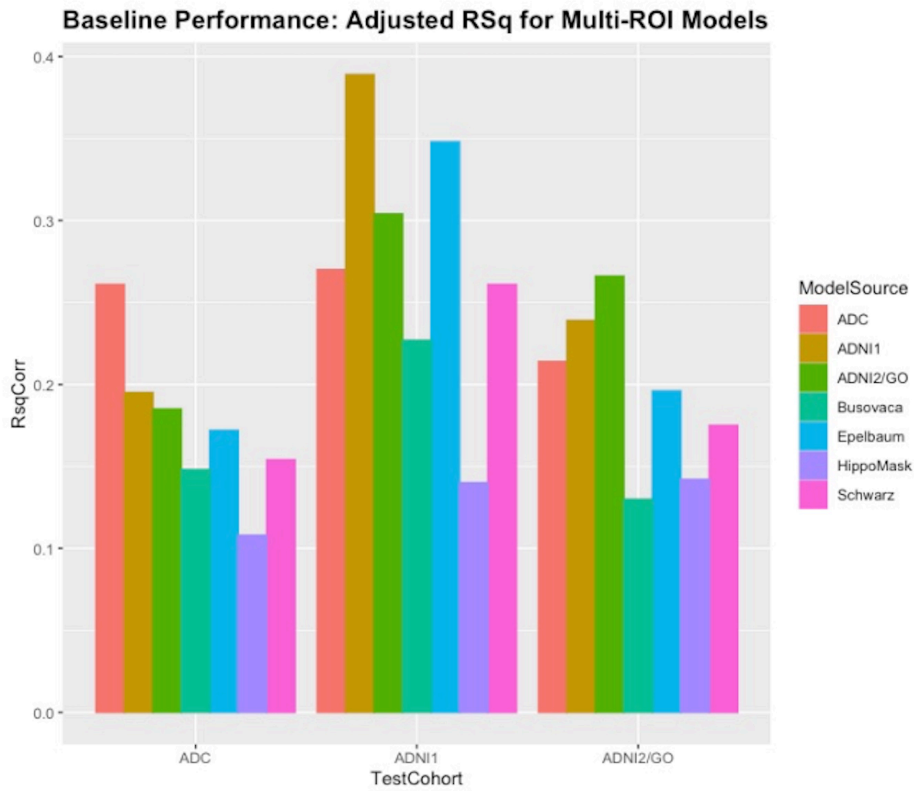

**Figure S1A.** Adjusted  $R^2$  performance comparisons across models at baseline. Table provides number of ROIs and thus the number of independent variables in each regression model.

| Model      | Number of ROIs |
|------------|----------------|
| ADC        | 5              |
| ADNI 1     | 6              |
| ADNI2/GO   | 6              |
| Busovaca   | 8              |
| Epelbaum   | 21             |
| Schwarz    | 6              |
| Hippo Mask | 1              |

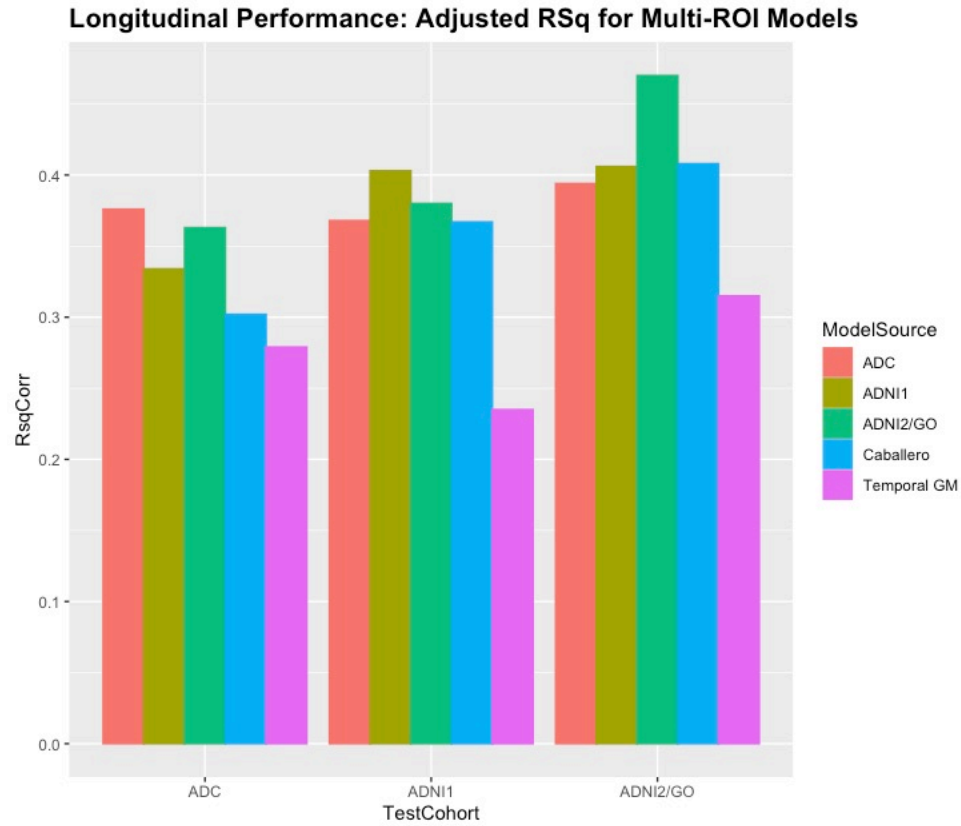

**Figure S1B.** Adjusted  $R^2$  performance comparisons across longitudinal models. Table provides number of ROIs and thus the number of independent variables in each regression model.

| <b>Model</b> | <b>Number of ROIs</b> |
|--------------|-----------------------|
| ADC          | 7                     |
| ADNI 1       | 9                     |
| ADNI2/GO     | 14                    |
| Caballero    | 12                    |
| Temporal GM  | 1                     |
